# Supplementary material for: Enhancing Self-Esteem and Body Image of Breast Cancer Women through Interventions: A Systematic Review
Source: PubMed Central journal article supplement (PMC7914971; doi:10.3390/ijerph18041640), 2021-02-09
Supplement: ijerph-18-01640-s001.pdf [file ijerph-18-01640-s001.pdf]

## Supplementary materials 1

Table S1. List of excluded studies and reasons for exclusion (n=29)

| N. | Reference                                                                                                                                                                                                                                                                                                                                                            | Reason for exclusion                                                         |
|----|----------------------------------------------------------------------------------------------------------------------------------------------------------------------------------------------------------------------------------------------------------------------------------------------------------------------------------------------------------------------|------------------------------------------------------------------------------|
| 1  | Boing, L.; do Bem Fretta, T.; de Carvalho Souza Vieira, M.; Pereira, G.S.; Moratelli, J.; Sperandio, F.F.; Bergmann, A.; Baptista, F.; Dias, M.; de Azevedo Guimarães, A.C. Pilates and dance to patients with breast cancer undergoing treatment: study protocol for a randomized clinical trial–MoveMama study. <i>Trials</i> , <b>2020</b> , <i>21</i> (1), 1-17. | No applied intervention identified (Study protocol)                          |
| 2  | Franco, C.; Amutio, A.; Mañas, I.; Sánchez-Sánchez, L. C.; Mateos-Pérez, E. Improving psychosocial functioning in mastectomized women through a mindfulness-based program: Flow meditation. <i>Int J Stress Manage</i> , <b>2020</b> , <i>27</i> (1), 74-81.                                                                                                         | Body image not assessed                                                      |
| 3  | Esplen, M. J.; Wong, J.; Warner, E.; Toner, B. Restoring body image after cancer (ReBIC): results of a randomized controlled trial. <i>J Clin Oncol</i> , <b>2018</b> , <i>36</i> (8), 749-756.                                                                                                                                                                      | Self-esteem not assessed                                                     |
| 4  | Di Mattei, V. E.; Carnelli, L.; Taranto, P.; Bernardi, M.; Brombin, C.; Cugnata, F.; ... Candiani, M. "Health in the Mirror": An Unconventional Approach to Unmet Psychological Needs in Oncology. <i>Front Psychol.</i> , <b>2017</b> , <i>8</i> (1633), 1-6                                                                                                        | No participants with breast cancer only / Results were not separately        |
| 5  | Napoles, T. M.; Guerra, C.; Orenstein, F.; Luce, J. A.; Merritt, S.; Burke, N. J. Healing art: Breast cancer survivor experiences with nipple-areola tattoo procedures during breast reconstruction. Proceedings of the San Antonio Breast Cancer Symposium, San Antonio, Texas, USA, <i>Cancer Res</i> , <b>2017</b> , <i>78</i> (4), P6-12-19                      | No applied intervention identified                                           |
| 6  | Landry, S.; Chasles, G.; Pointreau, Y.; Bourgeois, H.; Boyas, S. Influence of an adapted physical activity program on self-esteem and quality of life of breast cancer patients after mastectomy. <i>Oncology</i> , <b>2018</b> , <i>95</i> (3), 188-191.                                                                                                            | Body image not assessed                                                      |
| 7  | Marafante, G.; Ferri, C.; Giuffredi, I.; Bidin, L. Image and self-esteem: a photo-therapy program to improve body image, increase self-awareness and the expression of emotions in breast cancer patients. A pilot study. Proceedings of the 19th National Congress of Medical Oncology, Rome, Italy, <i>Ann Oncol</i> , <b>2017</b> , <i>28</i> , R16.              | Conference Abstract / Full-text not available                                |
| 8  | Pike, C.M.; Firriolo, J.M.; Ontiveros, N.C.; Kuchibhotla, S.P.; Oppel, O.K.; Monoxelos, L.C.; ...; Labow, B.I. (2017). A nonsurgical approach to adolescent breast asymmetry using external prostheses. <i>J Adoles Health</i> , <b>2017</b> , <i>61</i> (2), 240-245.                                                                                               | No participants with breast cancer                                           |
| 9  | Volders, J.H., Negenborn, V.L., Haloua, M.H., Krekel, N.M., Józwiak, K., Meijer, S., & M. van den Tol, P. Cosmetic outcome and quality of life are inextricably linked in breast-conserving therapy. <i>J Surg Oncol</i> , <b>2017</b> , <i>115</i> (8), 941-948.                                                                                                    | Body image and self-esteem not assessed / No applied intervention identified |
| 10 | Prates, A.C.L.; Freitas-Junior, R.; Prates, M.F.O.; Veloso, M. D.F.; Barros, N.D.M. Influence of body image in women undergoing treatment for breast cancer. <i>Rev Bras Ginecol Obstet</i> , <b>2017</b> , <i>39</i> (4), 175-183.                                                                                                                                  | No applied intervention identified                                           |
| 11 | Quintard, B.; Lakdja, F. Assessing the effect of beauty treatments on psychological distress, body image, and coping: a longitudinal study of patients undergoing surgical procedures for breast cancer. <i>Psychooncology</i> , <b>2008</b> , <i>17</i> (10), 1032-1038.                                                                                            | Self-esteem not assessed                                                     |

|    |                                                                                                                                                                                                                                                                                                                                |                                                                          |
|----|--------------------------------------------------------------------------------------------------------------------------------------------------------------------------------------------------------------------------------------------------------------------------------------------------------------------------------|--------------------------------------------------------------------------|
| 12 | McGarvey, E.L.; Baum, L. D.; Pinkerton, R. C.; Rogers, L.M. Psychological sequelae and alopecia among women with cancer. <i>Cancer Pract.</i> , <b>2001</b> , 9(6), 283-289.                                                                                                                                                   | No applied intervention identified                                       |
| 13 | Al-Ghazal, S.K.; Fallowfield, L.; Blamey, R.W. Does cosmetic outcome from treatment of primary breast cancer influence psychosocial morbidity? <i>Eur J Surg Oncol</i> , <b>1999</b> , 25(6), 571-573.                                                                                                                         | No applied intervention identified                                       |
| 14 | Izydorczyk, B., Kwapniewska, A., Lizinczyk, S., & Sitnik-Warchulska, K. Psychological resilience as a protective factor for the body image in post-mastectomy women with breast cancer. <i>Int J Environ Res Public Health</i> , <b>2018</b> , 15(6), 1181.                                                                    | Self-esteem not assessed / No applied intervention identified            |
| 15 | Barel-Shoshani, Z.A.; Kreitler, S. Changes in self-perception following breast cancer as expressed in self-figure drawings: Present-past. <i>Art Psychother</i> , <b>2017</b> , 55, 136-145.                                                                                                                                   | Self-esteem not assessed                                                 |
| 16 | Sbitti, Y.; Kadiri, H.; Essaidi, I.; Fadoukhair, Z.; Kharmoun, S.; Slimani, K.; ... Errihani, H. Breast cancer treatment and sexual dysfunction: Moroccan women's perception. <i>BMC women's health</i> , <b>2011</b> , 11(1), 1-5.                                                                                            | Self-esteem not assessed                                                 |
| 17 | Fobair, P., Stewart, S.L., Chang, S., D'Onofrio, C., Banks, P. J., & Bloom, J.R. Body image and sexual problems in young women with breast cancer. <i>Psychooncology</i> , <b>2006</b> , 15(7), 579-594.                                                                                                                       | No applied intervention identified / Self-esteem not assessed as outcome |
| 18 | Pinto, B.M.; Trunzo, J.J. Body esteem and mood among sedentary and active breast cancer survivors. <i>Mayo Clin Proc</i> , <b>2004</b> , 79(2), 181-186.                                                                                                                                                                       | Self-esteem not assessed / No applied intervention identified            |
| 19 | Berterö, C.M. Affected self-respect and self-value: the impact of breast cancer treatment on self-esteem and QoL. <i>Psychooncology</i> , <b>2002</b> , 11(4), 356-364.                                                                                                                                                        | Body image not assessed / No applied intervention identified             |
| 20 | Goldov, N.B. The effects of individualized brief medical dance/movement therapy on body image in women with breast cancer. Doctoral Dissertation, Argosy University, Seattle, 2011.                                                                                                                                            | Self-esteem not assessed / Doctoral Dissertation                         |
| 21 | Allen, J.L. <i>The effectiveness of group music psychotherapy in improving the self-concept of breast cancer survivors</i> . Doctoral Dissertation. Temple University. Philadelphia, Pennsylvania (USA). 2010.                                                                                                                 | Self-esteem not assessed / Doctoral Dissertation                         |
| 22 | Taylor, K.L.; Lamdan, R.M.; Siegel, J.E.; Shelby, R.; Moran-Klimi, K.; Hrywna, M. Psychological adjustment among African American breast cancer patients: One-year follow-up results of a randomized psychoeducational group intervention. <i>Health Psychol.</i> <b>2003</b> , 05;22(3), 316-323.                             | Body image and self-esteem not assessed / Not related with the topic     |
| 23 | Antoni, M.H.; Lehman, J.M.; Kilbourn, K.M.; Boyers, A.E.; Culver, J.L.; Alferi, S.M. Cognitive-behavioral stress management intervention decreases the prevalence of depression and enhances benefit finding among women under treatment for early-stage breast cancer. <i>Health Psychol</i> , <b>2001</b> , 01;20(1), 20-32. | Body image and self-esteem not assessed / Not related with the topic     |
| 24 | Helgeson, V.S.; Cohen, S. Social support and adjustment to cancer: Reconciling descriptive, correlational, and intervention research. <i>Health Psychol.</i> <b>1996</b> , 03;15(2), 135-148.                                                                                                                                  | Systematic review / No body image and self-esteem as outcomes            |
| 25 | Giese-Davis, J.; Koopman, C.; Butler, L.D.; Classen, C.; Cordova, M.; Fobair, P. Change in emotion-regulation strategy for women with metastatic breast cancer following supportive-expressive group therapy. <i>J Consult Clin Psychol</i> <b>2002</b> , 08;70(4), 916-925.                                                   | Body image and self-esteem not assessed / Not related with the topic     |

|    |                                                                                                                                                                                                                                               |                                                                                                    |
|----|-----------------------------------------------------------------------------------------------------------------------------------------------------------------------------------------------------------------------------------------------|----------------------------------------------------------------------------------------------------|
| 26 | Lechner, S.C.; Carver, C.S.; Antoni, M.H.; Weaver, K.E.; Phillips, K.M. Curvilinear associations between benefit finding and psychosocial adjustment to breast cancer. <i>J Consult Clin Psychol</i> <b>2006</b> , <i>10</i> ;74(5), 828-840. | Self-esteem not assessed / No applied intervention identified / Observational study                |
| 27 | Gilbar, O. Breast cancer: How do Israeli women cope? A cross-sectional sample. <i>Fam. Syst. Health</i> <b>2005</b> , <i>Jul</i> ;23(2), 161-171.                                                                                             | Body image and self-esteem not assessed / No applied intervention identified / Observational study |
| 28 | Tomich, P.L.; Helgeson, V.S. Is Finding Something Good in the Bad Always Good? Benefit Finding Among Women With Breast Cancer. <i>Health Psychol.</i> <b>2004</b> , <i>01</i> ;23(1), 16-23.                                                  | Body image and self-esteem not assessed / Observational study                                      |
| 29 | Sellers, T.S. A model of collaborative healthcare in outpatient medical oncology. <i>Fam. Syst. Health</i> <b>2000</b> , <i>Apr</i> ;18(1), 19-33.                                                                                            | No applied intervention identified                                                                 |
